# Supplementary material for: RBC micromotors carrying multiple cargos towards potential theranostic applications
Source: Royal Society of Chemistry journal article supplement (doi:10.1039/c5nr03730a), 2015-01-01
Supplement: c5nr03730a4.pdf [file c5nr03730a4.pdf]

# RBC micromotors carrying multiple cargos towards potential theranostic applications

Zhiguang Wu,<sup>a,b,‡</sup> Berta Esteban-Fernández de Ávila,<sup>a,‡</sup> Aída Martín,<sup>a,c</sup> Caleb Christianson,<sup>a</sup> Weiwei Gao,<sup>a</sup> Soracha Kun Thamphiwatana,<sup>a</sup> Alberto Escarpa,<sup>c</sup> Qiang He,<sup>b</sup> Liangfang Zhang,<sup>\*,a</sup> and Joseph Wang<sup>\*,a</sup>

<sup>a</sup> Department of Nanoengineering, University of California, San Diego, La Jolla, California 92093

<sup>b</sup> Micro/Nanotechnology Research Center, Harbin Institute of Technology, Harbin 150080, China

<sup>c</sup> Department of Analytical Chemistry, University of Alcalá de Henares, Madrid 28871, Spain

<sup>‡</sup> Z. Wu and B. Esteban-Fernández de Ávila contributed equally to this work.

## *Supporting Information*

### **1. Supporting Videos description**

### **2. Supporting Figures**

## **1. Supporting Videos description**

**SI Video 1.** Movement of cargo-loaded, red blood cell (RBC)-based micromotors in (300 mOsm, pH 7.2) PBS solution with encapsulated (a) MNPs, and (b) “MNPs, QDs, and DOX” under ultrasound field (2.4 MHz) oriented with an applied magnetic field provided by manually rotating a handheld magnet.

**SI Video 2.** Cargo-loaded, RBC-based micromotor’s movement under an US field and an external magnetic field in the linear microfluidic channel.

**SI Video 3.** Movement of cargo-loaded, RBC-based micromotors under US field with an external magnetic field in the Y-shaped microfluidic intersection.

**SI Video 4.** Magnetic control of “US-powered, cargo-loaded, RBC-based micromotors” in the T-shaped microfluidic chip intersection.

**SI Video 5.** Magnetic control of “US-powered, cargo-loaded RBC-based micromotors” in the linear PDMS microfluidic channel

## 2. Supporting Figures

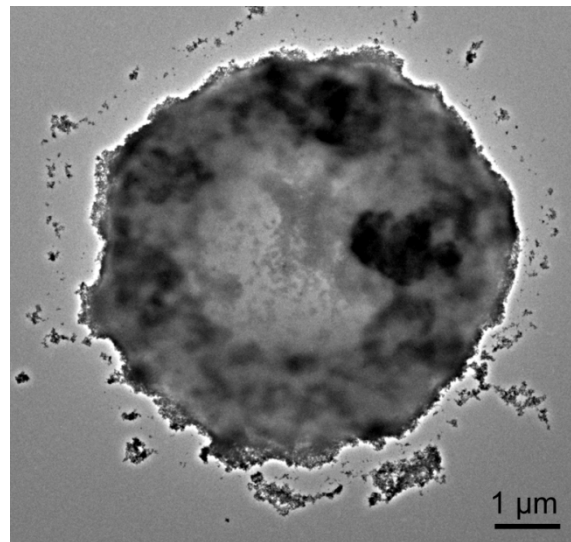

**SI Figure 1.** Transmission electron microscopy image of the RBC micromotor showing the internalization of high amount of aggregated MNPs.

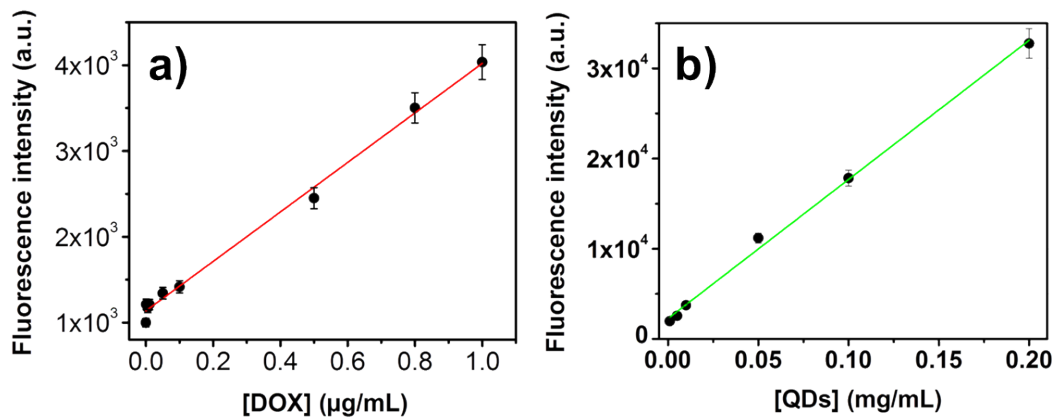

**SI Figure 2.** Quantitative assay of DOX and QDs uptake in cells. (a) Fluorescence DOX intensity calibration plot and (b) fluorescence QDs intensity calibration plot. Error bars were estimated as three times the standard deviation (n = 3 RBCs).

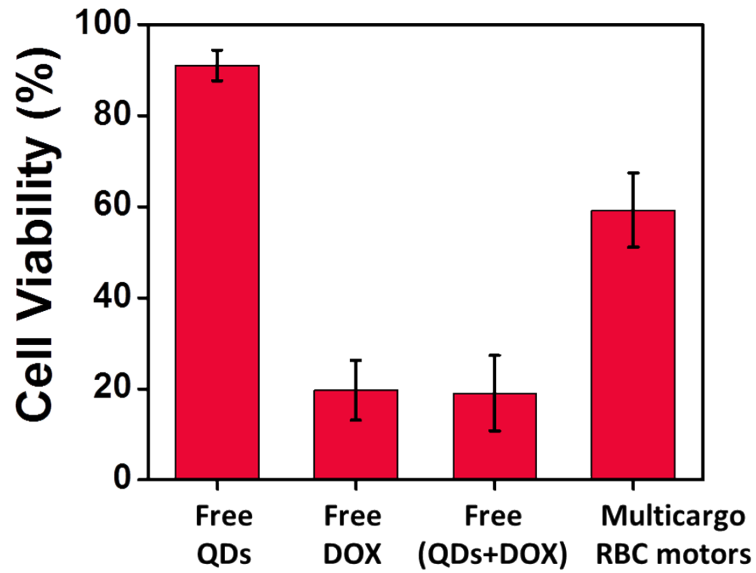

**SI Figure 3.** Cellular viability assay. Cytotoxicity of free QDs, free DOX, free QDs+DOX, and multicargo RBC micromotors (loaded at the same concentration level of free DOX and QDs), against Human Umbilical Vein Endothelial Cells (HUVEC) after 24 hours of incubation. Error bars were estimated as three times the standard deviation (n = 3 assays).
